# Supplementary material for: HGF-rs12536657 and Ocular Biometric Parameters in Hyperopic Children, Emmetropic Adolescents, and Young Adults: A Multicenter Quantitative Trait Study
Source: J Ophthalmol. 2019 Feb 3;2019:7454250. doi: 10.1155/2019/7454250 (PMC6378066; doi:10.1155/2019/7454250)
Supplement: Supplementary Materials — Genotypic and allelic test hyperopic children versus emmetropic children and hyperopic children versus emmetropic adults. [file 7454250.f1.pdf]

## Supplementary material

Genotypic and allelic test hyperopic children versus all emmetropic patients (chi squared test)

| SNP<br>rs12536657 |       | Hyperopic children | Emmetropic children and<br>adults | p (chi <sup>2</sup> )* |
|-------------------|-------|--------------------|-----------------------------------|------------------------|
| Genotype          | GG    | 116 (62.7%)        | 135 (63.1%)                       | 0.28                   |
|                   | GA    | 63 (34.1%)         | 65 (30.4%)                        |                        |
|                   | AA    | 6 (3.2%)           | 14 (6.5%)                         |                        |
|                   | Total | 185 (100%)         | 214 (100%)                        |                        |
| Allele            |       | Hyperopic children | Emmetropic children and<br>adults | p (chi <sup>2</sup> )* |
|                   |       | G                  | 295 (79.7%)                       | 0.66                   |
|                   |       | A                  | 75 (20.3%)                        |                        |
|                   |       | Total              | 370 (100%)                        |                        |

Genotypic and allelic test hyperopic children versus emmetropic children (chi squared test)

| SNP<br>rs12536657 |       | Hyperopic children | Emmetropic children | p (chi <sup>2</sup> ) |
|-------------------|-------|--------------------|---------------------|-----------------------|
| Genotype          | GG    | 116 (62.7%)        | 34 (65.4%)          | 0.27                  |
|                   | GA    | 63 (34.1%)         | 14 (26.9%)          |                       |
|                   | AA    | 6 (3.2%)           | 4 (7.7%)            |                       |
|                   | Total | 185 (100%)         | 52 (100%)           |                       |
| Allele            |       | Hyperopic children | Emmetropic children | p (chi <sup>2</sup> ) |
|                   |       | G                  | 295 (79.7%)         | 0.84                  |
|                   |       | A                  | 75 (20.3%)          |                       |
|                   |       | Total              | 370 (100%)          |                       |

Genotypic and allelic test hyperopic children versus emmetropic adults (chi squared test)

| SNP<br>rs12536657 |       | Hyperopic children | Emmetropic adults | p (chi <sup>2</sup> ) |
|-------------------|-------|--------------------|-------------------|-----------------------|
| Genotype          | GG    | 116 (62.7%)        | 101 (62.3%)       | 0.28                  |
|                   | GA    | 63 (34.1%)         | 51 (31.5%)        |                       |
|                   | AA    | 6 (3.2%)           | 10 (6.2%)         |                       |
|                   | Total | 185 (100%)         | 162 (100%)        |                       |
| Allele            |       | Hyperopic children | Emmetropic adults | p (chi <sup>2</sup> ) |
|                   |       | G                  | 295 (79.7%)       | 0.59                  |
|                   |       | A                  | 75 (20.3%)        |                       |
|                   |       | Total              | 370 (100%)        |                       |
